# Supplementary material for: Comparative Plastomics of Ashwagandha (Withania, Solanaceae) and Identification of Mutational Hotspots for Barcoding Medicinal Plants
Source: Preprints.org preprint supplement (doi:10.20944/preprints202003.0181.v1), 2020-03-11
Supplement: Supplementary file 2 [file Table S1 codon.docx]

| **Table S1** – RSCU (Relative synonymous codon usage) in the chloroplast genome of *W. somnifera, W. coagulans, W. adpressa* and *W. riebeckii* | | | | | | | | | | | |
| --- | --- | --- | --- | --- | --- | --- | --- | --- | --- | --- | --- |
| **Codon** | **Amino acid** | **Number of codons** | | |  | **Codon** | **Amino acid** | **Number of Codons** | | |  |
| ***WS*** | ***WC*** | ***WA*** | ***WR*** | ***WS*** | ***WC*** | ***WA*** | ***WR*** |
| GCA | A | 389 | 388 | 389 | 389 | CCA | P | 316 | 315 | 316 | 316 |
| GCC | A | 255 | 254 | 254 | 254 | CCC | P | 219 | 219 | 219 | 219 |
| GCG | A | 133 | 133 | 133 | 133 | CCG | P | 156 | 156 | 156 | 156 |
| GCT | A | 604 | 604 | 605 | 602 | CCT | P | 423 | 423 | 422 | 422 |
| TGC | C | 81 | 81 | 82 | 83 | CAA | Q | 699 | 698 | 698 | 698 |
| TGT | C | 209 | 209 | 209 | 209 | CAG | Q | 241 | 243 | 242 | 242 |
| GAC | D | 215 | 216 | 215 | 216 | AGA | R | 478 | 479 | 477 | 481 |
| GAT | D | 870 | 867 | 870 | 870 | AGG | R | 170 | 170 | 170 | 170 |
| GAA | E | 1,009 | 1,011 | 1010 | 1010 | CGA | R | 387 | 386 | 388 | 386 |
| GAG | E | 360 | 358 | 358 | 356 | CGC | R | 99 | 99 | 99 | 100 |
| TTC | F | 536 | 537 | 533 | 531 | CGG | R | 119 | 119 | 117 | 118 |
| TTT | F | 935 | 934 | 938 | 933 | CGT | R | 338 | 339 | 339 | 338 |
| GGA | G | 718 | 719 | 718 | 720 | AGC | S | 126 | 126 | 124 | 124 |
| GGC | G | 193 | 193 | 193 | 193 | AGT | S | 406 | 405 | 408 | 405 |
| GGG | G | 314 | 315 | 314 | 312 | TCA | S | 399 | 399 | 399 | 399 |
| GGT | G | 566 | 566 | 566 | 565 | TCC | S | 325 | 326 | 324 | 323 |
| CAC | H | 141 | 141 | 141 | 141 | TCG | S | 198 | 197 | 198 | 198 |
| CAT | H | 472 | 471 | 471 | 473 | TCT | S | 595 | 595 | 596 | 595 |
| ATA | I | 674 | 674 | 673 | 672 | ACA | T | 417 | 417 | 417 | 416 |
| ATC | I | 439 | 441 | 438 | 441 | ACC | T | 254 | 254 | 254 | 256 |
| ATT | I | 1,082 | 1,081 | 1,082 | 1085 | ACG | T | 140 | 140 | 140 | 140 |
| AAA | K | 1,046 | 1,045 | 1,046 | 1051 | ACT | T | 522 | 521 | 524 | 521 |
| AAG | K | 364 | 364 | 366 | 368 | GTA | V | 531 | 527 | 531 | 531 |
| CTA | L | 375 | 375 | 377 | 380 | GTC | V | 182 | 182 | 182 | 183 |
| CTC | L | 201 | 200 | 201 | 201 | GTG | V | 194 | 196 | 194 | 195 |
| CTG | L | 187 | 188 | 187 | 187 | GTT | V | 522 | 521 | 522 | 524 |
| CTT | L | 615 | 613 | 614 | 611 | TGG | W | 466 | 467 | 468 | 468 |
| TTA | L | 852 | 851 | 852 | 851 | TAC | Y | 189 | 190 | 190 | 191 |
| TTG | L | 558 | 561 | 599 | 560 | TAT | Y | 761 | 758 | 760 | 758 |
| ATG | M | 614 | 613 | 612 | 613 | TAA | * | 42 | 41 | 42 | 41 |
| ATC | M | - | - | 1 | - |  |  |  |  |  |  |
| GTG | M | 1 | - | 2 | - |  |  |  |  |  |  |
| AAC | N | 296 | 297 | 296 | 294 | TAG | * | 21 | 23 | 21 | 21 |
| AAT | N | 987 | 986 | 985 | 985 | TGA | * | 19 | 18 | 19 | 20 |
