# Supplementary material for: Comparative Plastomics of Ashwagandha (Withania, Solanaceae) and Identification of Mutational Hotspots for Barcoding Medicinal Plants
Source: Preprints.org preprint supplement (doi:10.20944/preprints202003.0181.v1), 2020-03-11
Supplement: Supplementary file 3 [file Table S2 base composition.docx]

**Table 2S -** Base composition in the *Withania somnifera* plastid genome

|  | **A%** | **C %** | **G%** | **T %** | **Length (bp)** |
| --- | --- | --- | --- | --- | --- |
| **Total** | 30.7 | 19.2 | 18.5 | 31.6 | 154,386 |
| **LSC** | 31.4 | 18.3 | 17.5 | 32.9 | 85,688 |
| **SSC** | 33.8 | 16.6 | 15.2 | 34.4 | 18,464 |
| **IR** | 28.5 | 20.7 | 22.4 | 28.4 | 25,117 |
| **tRNA** | 23.9 | 26.7 | 26.2 | 23.2 | 2802 |
| **rRNA** | 22.3 | 27.7 | 27.7 | 22.3 | 9068 |
| **Protein Coding genes** | 30.4 | 19.5 | 18.7 | 31.4 | 78,707 |
| **1st Position** | 31.0 | 19.4 | 18.2 | 31.3 | 51,462 |
| **2nd position** | 30.3 | 18.7 | 18.8 | 32.2 | 51,462 |
| **3rd position** | 30.8 | 19.3 | 18.6 | 31.3 | 51,462 |

**Table 2Sa -** Base composition in the *Withania coagulans* plastid genome

|  | **A%** | **C%** | **G%** | **T%** | **Length (bp)** |
| --- | --- | --- | --- | --- | --- |
| **Total** | 30.7 | 19.2 | 18.5 | 31.6 | 154,216 |
| **LSC** | 31.4 | 18.3 | 17.5 | 32.9 | 85,683 |
| **SSC** | 33.8 | 16.6 | 15.2 | 34.4 | 18,457 |
| **IR** | 28.5 | 20.8 | 22.4 | 28.3 | 25,038 |
| **tRNA** | 23.9 | 26.7 | 26.2 | 23.2 | 2802 |
| **rRNA** | 22.3 | 27.7 | 27.7 | 22.3 | 9068 |
| **Protein Coding genes** | 30.4 | 19.5 | 18.7 | 31.4 | 78,707 |
| **1st Position** | 30.8 | 19.1 | 18.6 | 31.5 | 51,406 |
| **2nd position** | 30.4 | 19.2 | 18.5 | 31.8 | 51,406 |
| **3rd position** | 31.0 | 18.5 | 18.5 | 31.4 | 51,405 |

**Table 2Sb -** Base composition in the *Withania adpressa* plastid genome

|  | **A%** | **C%** | **G%** | **T%** | **Length (bp)** |
| --- | --- | --- | --- | --- | --- |
| **Total** | 30.7 | 19.1 | 18.5 | 31.6 | 154,361 |
| **LSC** | 31.4 | 18.3 | 17.4 | 32.9 | 85,760 |
| **SSC** | 33.8 | 16.6 | 15.2 | 34.4 | 18,457 |
| **IR** | 28.5 | 20.7 | 22.4 | 28.3 | 25,067 |
| **tRNA** | 23.9 | 26.7 | 26.2 | 23.1 | 2806 |
| **rRNA** | 22.3 | 27.7 | 27.7 | 22.3 | 9068 |
| **Protein Coding genes** | 30.4 | 19.5 | 18.7 | 31.4 | 78,731 |
| **1st Position** | 30.6 | 19.3 | 18.7 | 31.4 | 51,451 |
| **2nd position** | 30.8 | 19.2 | 18.2 | 31.8 | 51,450 |
| **3rd position** | 30.7 | 19.0 | 18.7 | 31.6 | 51,450 |

**Table 2Sc -** Base composition in the *Withania riebeckii plastid* genome

|  | **A%** | **C%** | **G%** | **T%** | **Length (bp)** |
| --- | --- | --- | --- | --- | --- |
| **Total** | 30.7 | 19.2 | 18.5 | 31.6 | 154,198 |
| **LSC** | 31.4 | 18.3 | 17.5 | 32.8 | 85,675 |
| **SSC** | 33.7 | 16.6 | 15.2 | 34.5 | 18,469 |
| **IR** | 28.5 | 20.8 | 22.4 | 28.4 | 25,027 |
| **tRNA** | 23.9 | 26.7 | 26.2 | 23.1 | 2806 |
| **rRNA** | 22.3 | 27.7 | 27.7 | 22.3 | 9068 |
| **Protein Coding genes** | 30.4 | 19.5 | 18.7 | 31.4 | 78,618 |
| **1st Position** | 30.8 | 18.7 | 18.7 | 31.0 | 51,400 |
| **2nd position** | 30.9 | 18.8 | 18.3 | 32.0 | 51,399 |
| **3rd position** | 30.4 | 19.2 | 18.6 | 31.8 | 51,399 |
