# Supplementary material for: Comparative Plastomics of Ashwagandha (Withania, Solanaceae) and Identification of Mutational Hotspots for Barcoding Medicinal Plants
Source: Preprints.org preprint supplement (doi:10.20944/preprints202003.0181.v1), 2020-03-11
Supplement: Supplementary file 4 [file Table S3 SNP.xlsx]

## Sheet: WC LSC
Name	Minimum	Maximum	Length	Coverage	Polymorphism Type	Variant Frequency		TRUE
C	82741	82741	1	2	SNP	0.5	C/G	TRUE
C	82735	82735	1	2	SNP	0.5	C/T	TRUE
C	75725	75725	1	2	SNP	0.5	C/G	TRUE		Transition	C/T	9	12	9	Ts/Tv	1.2
A	70218	70218	1	2	SNP	0.5	A/C	TRUE			A/G	3		3
C	68540	68540	1	2	SNP	0.5	C/T	TRUE
C	60844	60844	1	2	SNP	0.5	C/T	TRUE		Transversion	A/T	5	10	5
A	58543	58543	1	2	SNP	0.5	A/G	TRUE			A/C	2		2
A	58542	58542	1	2	SNP	0.5	A/T	TRUE			G/T	1		1
A	58540	58540	1	2	SNP	0.5	A/T	TRUE			C/G	2		2
A	35017	35017	1	2	SNP	0.5	A/G	TRUE			Total	22		22
C	33257	33257	1	2	SNP	0.5	C/T	TRUE
C	33252	33252	1	2	SNP	0.5	C/T	TRUE
G	33250	33250	1	2	SNP	0.5	G/T	TRUE
A	29614	29614	1	2	SNP	0.5	A/T	TRUE
A	29613	29613	1	2	SNP	0.5	A/T	TRUE
A	19965	19965	1	2	SNP	0.5	A/T	TRUE
C	19907	19907	1	2	SNP	0.5	C/T	TRUE
C	19906	19906	1	2	SNP	0.5	C/T	TRUE
C	19905	19905	1	2	SNP	0.5	C/T	TRUE
C	19904	19904	1	2	SNP	0.5	C/T	TRUE
A	18494	18494	1	2	SNP	0.5	A/G	TRUE
A	6236	6236	1	2	SNP	0.5	A/C	TRUE

## Sheet: WC SSC
Name	Minimum	Maximum	Length	Coverage	Polymorphism Type	Variant Frequency		TRUE
G	15136	15136	1	2	SNP	0.5	G/	TRUE
										Transition	C/T	0	0	0	Ts/Tv	#DIV/0!
											A/G	0		0
										Transversion	A/T	0	0	0
											A/C	0		0
											G/T	0		0
											C/G	0		0
											Total	0		0

## Sheet: WC IR
Name	Minimum	Maximum	Length	Coverage	Polymorphism Type	Variant Frequency		TRUE
C	14931	14931	1	2	SNP	0.5	C/T	TRUE
A	14929	14929	1	2	SNP	0.5	A/G	TRUE		Transition	C/T	4	5	4	Ts/Tv	5
C	14928	14928	1	2	SNP	0.5	C/T	TRUE			A/G	1		1
C	14924	14924	1	2	SNP	0.5	C/T	TRUE
C	14910	14910	1	2	SNP	0.5	C/T	TRUE		Transversion	A/T	0	1	0
A	1901	1901	1	2	SNP	0.5	A/C	TRUE			A/C	1		1
											G/T	0		0
											C/G	0		0
											Total	6		6

## Sheet: WA LSC
Name	Minimum	Maximum	Length	Coverage	Polymorphism Type	Variant Frequency		TRUE
C	83441	83441	1	2	SNP	0.5	C/T	TRUE
C	82793	82793	1	2	SNP	0.5	C/T	TRUE
A	82096	82096	1	2	SNP	0.5	A/G	TRUE
A	78371	78371	1	2	SNP	0.5	A/T	TRUE		Transition	C/T	10	23	10	Ts/Tv	1.09524
A	78370	78370	1	2	SNP	0.5	A/T	TRUE			A/G	13		13
C	75781	75781	1	2	SNP	0.5	C/G	TRUE
C	73966	73966	1	2	SNP	0.5	C/T	TRUE		Transversion	A/T	4	21	4
G	72942	72942	1	2	SNP	0.5	G/T	TRUE			A/C	6		6
G	72922	72922	1	2	SNP	0.5	G/T	TRUE			G/T	9		9
A	70274	70274	1	2	SNP	0.5	A/C	TRUE			C/G	2		2
C	69991	69991	1	2	SNP	0.5	C/T	TRUE			Total	44		44
C	69131	69131	1	2	SNP	0.5	C/T	TRUE
G	68819	68819	1	2	SNP	0.5	G/T	TRUE
A	62292	62292	1	2	SNP	0.5	A/G	TRUE
G	53697	53697	1	2	SNP	0.5	G/T	TRUE
C	51702	51702	1	2	SNP	0.5	C/T	TRUE
C	49589	49589	1	2	SNP	0.5	C/T	TRUE
A	47882	47882	1	2	SNP	0.5	A/G	TRUE
A	47709	47709	1	2	SNP	0.5	A/C	TRUE
A	42679	42679	1	2	SNP	0.5	A/G	TRUE
A	39864	39864	1	2	SNP	0.5	A/G	TRUE
C	35678	35678	1	2	SNP	0.5	C/T	TRUE
A	35031	35031	1	2	SNP	0.5	A/G	TRUE
A	33253	33253	1	2	SNP	0.5	A/G	TRUE
G	32251	32251	1	2	SNP	0.5	G/T	TRUE
A	32132	32132	1	2	SNP	0.5	A/C	TRUE
A	31977	31977	1	2	SNP	0.5	A/T	TRUE
G	30785	30785	1	2	SNP	0.5	G/T	TRUE
A	29117	29117	1	2	SNP	0.5	A/G	TRUE
A	29078	29078	1	2	SNP	0.5	A/G	TRUE
A	28676	28676	1	2	SNP	0.5	A/G	TRUE
A	28166	28166	1	2	SNP	0.5	A/C	TRUE
G	27933	27933	1	2	SNP	0.5	G/T	TRUE
G	23704	23704	1	2	SNP	0.5	G/T	TRUE
G	21475	21475	1	2	SNP	0.5	G/T	TRUE
A	18503	18503	1	2	SNP	0.5	A/G	TRUE
C	17851	17851	1	2	SNP	0.5	C/G	TRUE
C	10739	10739	1	2	SNP	0.5	C/T	TRUE
A	10180	10180	1	2	SNP	0.5	A/T	TRUE
A	9787	9787	1	2	SNP	0.5	A/G	TRUE
A	9636	9636	1	2	SNP	0.5	A/C	TRUE
A	7492	7492	1	2	SNP	0.5	A/G	TRUE
A	4456	4456	1	2	SNP	0.5	A/C	TRUE
C	1723	1723	1	2	SNP	0.5	C/T	TRUE

## Sheet: WA SSC
Name	Minimum	Maximum	Length	Coverage	Polymorphism Type	Variant Frequency		TRUE
G	18274	18274	1	2	SNP	0.5	G/T	TRUE
G	18175	18175	1	2	SNP	0.5	G/T	TRUE
A	17045	17045	1	2	SNP	0.5	A/G	TRUE		Transition	C/T	3	10	3	Ts/Tv	1
A	16223	16223	1	2	SNP	0.5	A/C	TRUE			A/G	7		7
A	16196	16196	1	2	SNP	0.5	A/G	TRUE
A	15770	15770	1	2	SNP	0.5	A/G	TRUE		Transversion	A/T	0	10	0
A	13958	13958	1	2	SNP	0.5	A/C	TRUE			A/C	4		4
C	13370	13370	1	2	SNP	0.5	C/T	TRUE			G/T	5		5
G	13225	13225	1	2	SNP	0.5	G/T	TRUE			C/G	1		1
A	10622	10622	1	2	SNP	0.5	A/G	TRUE			Total	20		20
A	10620	10620	1	2	SNP	0.5	A/G	TRUE
A	10615	10615	1	2	SNP	0.5	A/G	TRUE
C	9535	9535	1	2	SNP	0.5	C/T	TRUE
G	8210	8210	1	2	SNP	0.5	G/T	TRUE
A	5501	5501	1	2	SNP	0.5	A/G	TRUE
C	3602	3602	1	2	SNP	0.5	C/G	TRUE
G	3228	3228	1	2	SNP	0.5	G/T	TRUE
A	2500	2500	1	2	SNP	0.5	A/C	TRUE
A	531	531	1	2	SNP	0.5	A/C	TRUE
C	327	327	1	2	SNP	0.5	C/T	TRUE

## Sheet: WA IR
Name	Minimum	Maximum	Length	Coverage	Polymorphism Type	Variant Frequency		TRUE
A	24319	24319	1	2	SNP	0.5	A/C	TRUE		Transition	C/T	2	2	2	Ts/Tv	2
C	4878	4878	1	2	SNP	0.5	C/T	TRUE			A/G	0		0
C	3304	3304	1	2	SNP	0.5	C/T	TRUE
										Transversion	A/T	0	1	0
											A/C	1		1
											G/T	0		0
											C/G	0		0
											Total	3		3

## Sheet: WR LSC
Name	Minimum	Maximum	Length	Coverage	Polymorphism Type	Variant Frequency		TRUE
A	84176	84176	1	2	SNP	0.5	A/T	TRUE
C	83414	83414	1	2	SNP	0.5	C/T	TRUE
A	83357	83357	1	2	SNP	0.5	A/G	TRUE
G	82939	82939	1	2	SNP	0.5	G/T	TRUE		Transition	C/T	20	42	20	Ts/Tv	1.13514
C	82766	82766	1	2	SNP	0.5	C/T	TRUE			A/G	22		22
A	82069	82069	1	2	SNP	0.5	A/G	TRUE
A	81667	81667	1	2	SNP	0.5	A/G	TRUE		Transversion	A/T	11	37	11
G	81390	81390	1	2	SNP	0.5	G/T	TRUE			A/C	9		9
A	78774	78774	1	2	SNP	0.5	A/G	TRUE			G/T	15		15
A	78759	78759	1	2	SNP	0.5	A/T	TRUE			C/G	2		2
A	78344	78344	1	2	SNP	0.5	A/T	TRUE			Total	79		79
A	78343	78343	1	2	SNP	0.5	A/T	TRUE
A	77111	77111	1	2	SNP	0.5	A/G	TRUE
C	75754	75754	1	2	SNP	0.5	C/G	TRUE
C	73939	73939	1	2	SNP	0.5	C/T	TRUE
G	72895	72895	1	2	SNP	0.5	G/T	TRUE
C	71018	71018	1	2	SNP	0.5	C/T	TRUE
A	70247	70247	1	2	SNP	0.5	A/C	TRUE
C	69964	69964	1	2	SNP	0.5	C/T	TRUE
C	69120	69120	1	2	SNP	0.5	C/T	TRUE
C	65303	65303	1	2	SNP	0.5	C/T	TRUE
A	64089	64089	1	2	SNP	0.5	A/G	TRUE
A	62280	62280	1	2	SNP	0.5	A/G	TRUE
A	59850	59850	1	2	SNP	0.5	A/G	TRUE
C	58094	58094	1	2	SNP	0.5	C/T	TRUE
A	54613	54613	1	2	SNP	0.5	A/G	TRUE
A	53796	53796	1	2	SNP	0.5	A/G	TRUE
G	53683	53683	1	2	SNP	0.5	G/T	TRUE
C	51688	51688	1	2	SNP	0.5	C/T	TRUE
A	51312	51312	1	2	SNP	0.5	A/G	TRUE
A	48414	48414	1	2	SNP	0.5	A/G	TRUE
C	47953	47953	1	2	SNP	0.5	C/T	TRUE
A	47873	47873	1	2	SNP	0.5	A/G	TRUE
A	47700	47700	1	2	SNP	0.5	A/C	TRUE
G	43456	43456	1	2	SNP	0.5	G/T	TRUE
A	42670	42670	1	2	SNP	0.5	A/G	TRUE
A	39855	39855	1	2	SNP	0.5	A/G	TRUE
A	37929	37929	1	2	SNP	0.5	A/C	TRUE
G	37762	37762	1	2	SNP	0.5	G/T	TRUE
C	35669	35669	1	2	SNP	0.5	C/T	TRUE
G	32242	32242	1	2	SNP	0.5	G/T	TRUE
A	31968	31968	1	2	SNP	0.5	A/T	TRUE
G	31735	31735	1	2	SNP	0.5	G/T	TRUE
G	30776	30776	1	2	SNP	0.5	G/T	TRUE
G	29295	29295	1	2	SNP	0.5	G/T	TRUE
A	29108	29108	1	2	SNP	0.5	A/G	TRUE
A	28667	28667	1	2	SNP	0.5	A/G	TRUE
G	27924	27924	1	2	SNP	0.5	G/T	TRUE
A	23593	23593	1	2	SNP	0.5	A/T	TRUE
G	21466	21466	1	2	SNP	0.5	G/T	TRUE
A	18494	18494	1	2	SNP	0.5	A/G	TRUE
C	17842	17842	1	2	SNP	0.5	C/G	TRUE
A	17013	17013	1	2	SNP	0.5	A/C	TRUE
C	14751	14751	1	2	SNP	0.5	C/T	TRUE
C	14023	14023	1	2	SNP	0.5	C/T	TRUE
C	13392	13392	1	2	SNP	0.5	C/T	TRUE
C	10730	10730	1	2	SNP	0.5	C/T	TRUE
A	10421	10421	1	2	SNP	0.5	A/G	TRUE
A	10177	10177	1	2	SNP	0.5	A/T	TRUE
A	10171	10171	1	2	SNP	0.5	A/T	TRUE
A	9779	9779	1	2	SNP	0.5	A/G	TRUE
A	9628	9628	1	2	SNP	0.5	A/C	TRUE
G	9256	9256	1	2	SNP	0.5	G/T	TRUE
C	8693	8693	1	2	SNP	0.5	C/T	TRUE
A	8300	8300	1	2	SNP	0.5	A/G	TRUE
A	7603	7603	1	2	SNP	0.5	A/C	TRUE
A	7484	7484	1	2	SNP	0.5	A/G	TRUE
A	7458	7458	1	2	SNP	0.5	A/T	TRUE
C	6582	6582	1	2	SNP	0.5	C/T	TRUE
C	6396	6396	1	2	SNP	0.5	C/T	TRUE
C	5583	5583	1	2	SNP	0.5	C/T	TRUE
A	4607	4607	1	2	SNP	0.5	A/T	TRUE
A	4449	4449	1	2	SNP	0.5	A/C	TRUE
G	3959	3959	1	2	SNP	0.5	G/T	TRUE
C	1716	1716	1	2	SNP	0.5	C/T	TRUE
A	792	792	1	2	SNP	0.5	A/T	TRUE
A	503	503	1	2	SNP	0.5	A/C	TRUE
A	224	224	1	2	SNP	0.5	A/C	TRUE
G	123	123	1	2	SNP	0.5	G/T	TRUE

## Sheet: WR SSC
Name	Minimum	Maximum	Length	Coverage	Polymorphism Type	Variant Frequency		t/f
G	18274	18274	1	2	SNP	0.5	G/T	TRUE
G	18175	18175	1	2	SNP	0.5	G/T	TRUE
A	17045	17045	1	2	SNP	0.5	A/G	TRUE		Transition	C/T	3	10	3	Ts/Tv	1
A	16223	16223	1	2	SNP	0.5	A/C	TRUE			A/G	7		7
A	16196	16196	1	2	SNP	0.5	A/G	TRUE
A	15770	15770	1	2	SNP	0.5	A/G	TRUE		Transversion	A/T	0	10	0
A	13958	13958	1	2	SNP	0.5	A/C	TRUE			A/C	4		4
C	13370	13370	1	2	SNP	0.5	C/T	TRUE			G/T	5		5
G	13225	13225	1	2	SNP	0.5	G/T	TRUE			C/G	1		1
A	10622	10622	1	2	SNP	0.5	A/G	TRUE			Total	20		20
A	10620	10620	1	2	SNP	0.5	A/G	TRUE
A	10615	10615	1	2	SNP	0.5	A/G	TRUE
C	9535	9535	1	2	SNP	0.5	C/T	TRUE
G	8210	8210	1	2	SNP	0.5	G/T	TRUE
A	5501	5501	1	2	SNP	0.5	A/G	TRUE
C	3602	3602	1	2	SNP	0.5	C/G	TRUE
G	3228	3228	1	2	SNP	0.5	G/T	TRUE
A	2500	2500	1	2	SNP	0.5	A/C	TRUE
A	531	531	1	2	SNP	0.5	A/C	TRUE
C	327	327	1	2	SNP	0.5	C/T	TRUE

## Sheet: WR IR
Name	Minimum	Maximum	Length	Coverage	Polymorphism Type	Variant Frequency		TRUE
G	23301	23301	1	2	SNP	0.5	G/T	TRUE
A	5110	5110	1	2	SNP	0.5	A/T	TRUE
C	4878	4878	1	2	SNP	0.5	C/T	TRUE			Transition	C/T	4	4	4	Ts/Tv	1
C	3304	3304	1	2	SNP	0.5	C/T	TRUE				A/G	0		0
C	3044	3044	1	2	SNP	0.5	C/T	TRUE
G	2709	2709	1	2	SNP	0.5	G/T	TRUE			Transversion	A/T	2	4	2
C	250	250	1	2	SNP	0.5	C/T	TRUE				A/C	0		0
A	85	85	1	2	SNP	0.5	A/T	TRUE				G/T	2		2
												C/G	0		0
												Total	8		8

## Sheet: ratio
	Transition	Transversion
	108	94	54:47
wc	17	11	17:11	1.5
wa	35	32	35:32	1
wr	56	51	56:51	1.07
