# Supplementary material for: Comparative Plastomics of Ashwagandha (Withania, Solanaceae) and Identification of Mutational Hotspots for Barcoding Medicinal Plants
Source: Preprints.org preprint supplement (doi:10.20944/preprints202003.0181.v1), 2020-03-11
Supplement: Supplementary file 7 [file Table S6 Tandem Repeats.docx]

**Table S7**. Tandem Repeat sequences in the *Withania somnifera* chloroplast genome.

| Serial no | Indices | Repeat  Length | Size of repeat unit **×** Copy number | A | C | G | T | Location |
| --- | --- | --- | --- | --- | --- | --- | --- | --- |
| 1 | [155--179](http://tandem.bu.edu/trf/output/13DKwAVOVjjpw.2.7.7.80.10.50.500.1.txt.html#155--179,12,2.1,12,1) | 24 | 2 **×** 12 | 8 | 16 | 0 | 76 | trnH-GUG/ psbA(IGS) |
| 2 | [5013--5038](http://tandem.bu.edu/trf/output/13DKwAVOVjjpw.2.7.7.80.10.50.500.1.txt.html#5013--5038,13,2.0,13,2) | 26 | 2 × 13 | 23 | 15 | 0 | 61 | trnk-UUU/rps16 (IGS) |
| 3 | [6251--6280](http://tandem.bu.edu/trf/output/13DKwAVOVjjpw.2.7.7.80.10.50.500.1.txt.html#6251--6280,10,3.1,10,3) | 30 | 3 × 10 | 20 | 20 | 0 | 60 | rps16/ trnQ-UUG (IGS) |
| 4 | [6389--6437](http://tandem.bu.edu/trf/output/13DKwAVOVjjpw.2.7.7.80.10.50.500.1.txt.html#6389--6437,23,2.1,24,4) | 48 | 2 × 24 | 53 | 0 | 0 | 46 | rps16/ trnQ-UUG (IGS) |
| 5 | [16954--16986](http://tandem.bu.edu/trf/output/13DKwAVOVjjpw.2.7.7.80.10.50.500.1.txt.html#16954--16986,17,2.0,16,5) | 32 | 2 × 16 | 18 | 15 | 0 | 66 | rps2/rpoc2 (IGS) |
| 6 | [33337--33362](http://tandem.bu.edu/trf/output/13DKwAVOVjjpw.2.7.7.80.10.50.500.1.txt.html#33337--33362,13,2.0,13,6) | 26 | 2 × 13 | 38 | 7 | 0 | 53 | trnT-GGU/psbD (IGS) |
| 7 | [49417--49445](http://tandem.bu.edu/trf/output/13DKwAVOVjjpw.2.7.7.80.10.50.500.1.txt.html#49417--49445,14,2.1,14,7) | 28 | 2 × 14 | 44 | 27 | 13 | 13 | trnl-UAA/trnF-GAA(IGS) |
| 8 | [52070--52094](http://tandem.bu.edu/trf/output/13DKwAVOVjjpw.2.7.7.80.10.50.500.1.txt.html#52070--52094,11,2.3,11,8) | 22 | 2 × 11 | 24 | 0 | 0 | 76 | ndhC/trnV-UAC (IGS) |
| 9 | [68333--68382](http://tandem.bu.edu/trf/output/13DKwAVOVjjpw.2.7.7.80.10.50.500.1.txt.html#68333--68382,25,2.0,25,9) | 50 | 2 × 25 | 56 | 8 | 2 | 34 | trnP-UGG/psaJ (IGS) |
| 10 | [69580--69620](http://tandem.bu.edu/trf/output/13DKwAVOVjjpw.2.7.7.80.10.50.500.1.txt.html#69580--69620,21,2.0,21,10) | 42 | 2 × 21 | 29 | 24 | 9 | 36 | rps 18 (CDS) |
| 11 | [83779--83806](http://tandem.bu.edu/trf/output/13DKwAVOVjjpw.2.7.7.80.10.50.500.1.txt.html#83779--83806,14,2.0,14,11) | 28 | 2 × 14 | 28 | 14 | 0 | 57 | rpl16 (intron) |
| 12 | [90522--90589](http://tandem.bu.edu/trf/output/13DKwAVOVjjpw.2.7.7.80.10.50.500.1.txt.html#90522--90589,21,3.2,21,13) | 63 | 3 × 21 | 11 | 23 | 8 | 55 | Ycf 2 (CDS) |
| 13 | [92942--93001](http://tandem.bu.edu/trf/output/13DKwAVOVjjpw.2.7.7.80.10.50.500.1.txt.html#92942--93001,18,3.3,18,14) | 54 | 3 × 18 | 31 | 10 | 25 | 33 | Ycf 2 (CDS) |
| 14 | [95399--95434](http://tandem.bu.edu/trf/output/13DKwAVOVjjpw.2.7.7.80.10.50.500.1.txt.html#95399--95434,17,2.1,17,15) | 34 | 2 × 17 | 41 | 11 | 5 | 41 | trnl-CAA/ndhB (IGS) |
| 15 | [100364--100425](http://tandem.bu.edu/trf/output/13DKwAVOVjjpw.2.7.7.80.10.50.500.1.txt.html#100364--100425,22,2.7,24,16) | 48 | 2 × 24 | 35 | 3 | 9 | 51 | rps12/ycf15 (IGS) |
| 16 | [108147--108212](http://tandem.bu.edu/trf/output/13DKwAVOVjjpw.2.7.7.80.10.50.500.1.txt.html#108147--108212,32,2.1,32,17) | 64 | 2 × 32 | 42 | 22 | 9 | 25 | 4.5/5S Rrna (IGS) |
| 17 | [112454--112492](http://tandem.bu.edu/trf/output/13DKwAVOVjjpw.2.7.7.80.10.50.500.1.txt.html#112454--112492,20,2.0,20,18) | 40 | 2 × 20 | 56 | 23 | 0 | 20 | ndhF (CDS) |
| 18 | [113133--113173](http://tandem.bu.edu/trf/output/13DKwAVOVjjpw.2.7.7.80.10.50.500.1.txt.html#113133--113173,10,4.1,10,19) | 40 | 4 × 10 | 51 | 12 | 0 | 36 | ­­­­­­­ndhF/rpl32 (IGS) |
| 19 | [127872--127931](http://tandem.bu.edu/trf/output/13DKwAVOVjjpw.2.7.7.80.10.50.500.1.txt.html#127872--127931,28,2.2,28,21) | 56 | 2 × 28 | 0 | 23 | 5 | 71 | ycf1 (CDS) |
| 20 | [131863--131928](http://tandem.bu.edu/trf/output/13DKwAVOVjjpw.2.7.7.80.10.50.500.1.txt.html#131863--131928,32,2.1,32,25) | 64 | 2 × 32 | 25 | 9 | 22 | 42 | rrn 5/rrn 4.5S (IGS) |
| 21 | [139650--139711](http://tandem.bu.edu/trf/output/13DKwAVOVjjpw.2.7.7.80.10.50.500.1.txt.html#139650--139711,22,2.7,24,26) | 48 | 2 × 24 | 51 | 9 | 3 | 35 | Ycf15/rps12 (IGS) |
| 22 | [144641--144676](http://tandem.bu.edu/trf/output/13DKwAVOVjjpw.2.7.7.80.10.50.500.1.txt.html#144641--144676,17,2.1,17,27) | 34 | 2 × 17 | 41 | 5 | 11 | 41 | ndhB/ trnL-CAA (IGS) |
| 23 | [147074--147133](http://tandem.bu.edu/trf/output/13DKwAVOVjjpw.2.7.7.80.10.50.500.1.txt.html#147074--147133,18,3.3,18,29) | 54 | 3 × 18 | 33 | 25 | 10 | 31 | Ycf2 (CDS) |
| 24 | [149486--149575](http://tandem.bu.edu/trf/output/13DKwAVOVjjpw.2.7.7.80.10.50.500.1.txt.html#149486--149575,21,4.1,22,31) | 88 | 4 × 22 | 53 | 10 | 24 | 12 | Ycf2 (CDS) |

**Table S7a**. Tandem Repeat sequences in the *Withania coagulans* chloroplast genome.

| Serial no | Indices | Repeat Length | Size of repeat unit × Copy Number | A | C | G | T | Location |
| --- | --- | --- | --- | --- | --- | --- | --- | --- |
| 1 | [155--179](http://tandem.bu.edu/trf/output/785Zc7WxqoG4o.2.7.7.80.10.50.500.1.txt.html#155--179,12,2.1,12,1) | 24 | 12×2 | 8 | 16 | 0 | 76 | *trnH-GUG/ psbA (IGS)* |
| 2 | [5012--5037](http://tandem.bu.edu/trf/output/785Zc7WxqoG4o.2.7.7.80.10.50.500.1.txt.html#5012--5037,13,2.0,13,2) | 36 | 13×2 | 23 | 15 | 0 | 61 | *trnk-UUU/rps16 (IGS)* |
| 3 | [6250--6279](http://tandem.bu.edu/trf/output/785Zc7WxqoG4o.2.7.7.80.10.50.500.1.txt.html#6250--6279,10,3.1,10,3) | 30 | 10×3 | 20 | 20 | 0 | 60 | *rps16/ trnQ-UUG (IGS)* |
| 4 | [16930--16962](http://tandem.bu.edu/trf/output/785Zc7WxqoG4o.2.7.7.80.10.50.500.1.txt.html#16930--16962,17,2.0,16,4) | 34 | 17×2 | 18 | 15 | 0 | 66 | *rps2/rpoc2 (IGS)* |
| 5 | [33301--33326](http://tandem.bu.edu/trf/output/785Zc7WxqoG4o.2.7.7.80.10.50.500.1.txt.html#33301--33326,13,2.0,13,5) | 36 | 13×2 | 38 | 7 | 0 | 53 | *trnT-GGU/psbD (IGS)* |
| 6 | [49381--49409](http://tandem.bu.edu/trf/output/785Zc7WxqoG4o.2.7.7.80.10.50.500.1.txt.html#49381--49409,14,2.1,14,6) | 28 | 14×2 | 44 | 27 | 13 | 13 | *trnl-UAA/trnF-GAA(IGS)* |
| 7 | [52034--52058](http://tandem.bu.edu/trf/output/785Zc7WxqoG4o.2.7.7.80.10.50.500.1.txt.html#52034--52058,11,2.3,11,7) | 22 | 11×2 | 24 | 0 | 0 | 76 | *ndhC/trnV-UAC (IGS)* |
| 8 | [68287--68336](http://tandem.bu.edu/trf/output/785Zc7WxqoG4o.2.7.7.80.10.50.500.1.txt.html#68287--68336,25,2.0,25,8) | 50 | 25×2 | 56 | 8 | 2 | 34 | *trnp-UGG/psaJ (IGS)* |
| 9 | [69531--69571](http://tandem.bu.edu/trf/output/785Zc7WxqoG4o.2.7.7.80.10.50.500.1.txt.html#69531--69571,21,2.0,21,9) | 42 | 21×2 | 29 | 24 | 9 | 36 | *rps 18 (CDS)* |
| 10 | [83724--83751](http://tandem.bu.edu/trf/output/785Zc7WxqoG4o.2.7.7.80.10.50.500.1.txt.html#83724--83751,14,2.0,14,10) | 28 | 14×2 | 28 | 14 | 0 | 57 | *rpl16 (intron)* |
| 11 | [90459--90526](http://tandem.bu.edu/trf/output/785Zc7WxqoG4o.2.7.7.80.10.50.500.1.txt.html#90459--90526,21,3.2,21,12) | 63 | 21×3 | 11 | 23 | 8 | 55 | *ycf 2 (CDS)* |
| 12 | [92879--92938](http://tandem.bu.edu/trf/output/785Zc7WxqoG4o.2.7.7.80.10.50.500.1.txt.html#92879--92938,18,3.3,18,13) | 54 | 18×3 | 31 | 10 | 25 | 33 | *ycf 2 (CDS)* |
| 13 | [95336--95371](http://tandem.bu.edu/trf/output/785Zc7WxqoG4o.2.7.7.80.10.50.500.1.txt.html#95336--95371,17,2.1,17,14) | 34 | 17×2 | 41 | 11 | 5 | 41 | *trnl-CAA/ndhB (IGS)* |
| 14 | [100301--100362](http://tandem.bu.edu/trf/output/785Zc7WxqoG4o.2.7.7.80.10.50.500.1.txt.html#100301--100362,22,2.7,24,15) | 44 | 22×2 | 35 | 3 | 9 | 51 | *Rps12/trnV-GSS (IGS)* |
| 15 | [108084--108149](http://tandem.bu.edu/trf/output/785Zc7WxqoG4o.2.7.7.80.10.50.500.1.txt.html#108084--108149,32,2.1,32,16) | 64 | 32×2 | 42 | 22 | 9 | 25 | *4.5/5S Rrna (IGS)* |
| 16 | [112391--112429](http://tandem.bu.edu/trf/output/785Zc7WxqoG4o.2.7.7.80.10.50.500.1.txt.html#112391--112429,20,2.0,20,17) | 40 | 20×2 | 56 | 23 | 0 | 20 | *ndhF (CDS)* |
| 17 | [113070--113110](http://tandem.bu.edu/trf/output/785Zc7WxqoG4o.2.7.7.80.10.50.500.1.txt.html#113070--113110,10,4.1,10,18) | 40 | 10×4 | 51 | 12 | 0 | 36 | *­­­­­­­ndhF/rpl32 (IGS)* |
| 18 | [127806--127865](http://tandem.bu.edu/trf/output/785Zc7WxqoG4o.2.7.7.80.10.50.500.1.txt.html#127806--127865,28,2.2,28,20) | 56 | 28×2 | 0 | 23 | 5 | 71 | *ycf1 (CDS)* |
| 19 | [131843--131908](http://tandem.bu.edu/trf/output/785Zc7WxqoG4o.2.7.7.80.10.50.500.1.txt.html#131843--131908,32,2.1,32,24) | 64 | 32×2 | 25 | 9 | 22 | 42 | *rrn 5/rrn 4.5S (IGS)* |
| 20 | [139630--139691](http://tandem.bu.edu/trf/output/785Zc7WxqoG4o.2.7.7.80.10.50.500.1.txt.html#139630--139691,22,2.7,24,25) | 44 | 22×2 | 51 | 9 | 3 | 35 | *ycf15/rps12 (IGS)* |
| 21 | [144621--144656](http://tandem.bu.edu/trf/output/785Zc7WxqoG4o.2.7.7.80.10.50.500.1.txt.html#144621--144656,17,2.1,17,26) | 34 | 17×2 | 41 | 5 | 11 | 41 | *ndhB/ trnL-CAA (IGS)* |
| 22 | [147054--147113](http://tandem.bu.edu/trf/output/785Zc7WxqoG4o.2.7.7.80.10.50.500.1.txt.html#147054--147113,18,3.3,18,28) | 54 | 18×3 | 33 | 25 | 10 | 31 |  |
| 23 | [149466--149555](http://tandem.bu.edu/trf/output/785Zc7WxqoG4o.2.7.7.80.10.50.500.1.txt.html#149466--149555,21,4.1,22,30) | 84 | 21×4 | 53 | 10 | 24 | 12 | *ycf2 (CDS)* |

**Table S7b**. Tandem Repeat sequences in the *Withania adpressa* chloroplast genome.

| Serial no | Indices | Repeat Length | Size of repeat unit × Copy number | A | C | G | T | Location |
| --- | --- | --- | --- | --- | --- | --- | --- | --- |
| 1 | [162--186](http://tandem.bu.edu/trf/output/903gUh6q031pg.2.7.7.80.10.50.500.1.txt.html#162--186,12,2.1,12,1) | 24 | 12×2 | 8 | 16 | 0 | 76 | *trnH-GUG/ psbA (IGS)* |
| 2 | [5018--5043](http://tandem.bu.edu/trf/output/903gUh6q031pg.2.7.7.80.10.50.500.1.txt.html#5018--5043,13,2.0,13,2) | 26 | 13×2 | 23 | 15 | 0 | 61 | *trnk-UUU/rps16 (IGS)* |
| 3 | [6256--6285](http://tandem.bu.edu/trf/output/903gUh6q031pg.2.7.7.80.10.50.500.1.txt.html#6256--6285,10,3.1,10,3) | 30 | 10×3 | 20 | 20 | 0 | 60 | *rps16/ trnQ-UUG (IGS)* |
| 4 | [6394--6442](http://tandem.bu.edu/trf/output/903gUh6q031pg.2.7.7.80.10.50.500.1.txt.html#6394--6442,23,2.1,24,4) | 46 | 23×2 | 53 | 0 | 0 | 46 | *rps16/ trnQ-UUG (IGS)* |
| 5 | [16954--16986](http://tandem.bu.edu/trf/output/903gUh6q031pg.2.7.7.80.10.50.500.1.txt.html#16954--16986,17,2.0,16,5) | 34 | 17×2 | 18 | 15 | 0 | 66 | *rps2/rpoc2 (IGS)* |
| 6 | [33339--33364](http://tandem.bu.edu/trf/output/903gUh6q031pg.2.7.7.80.10.50.500.1.txt.html#33339--33364,13,2.0,13,6) | 26 | 13×2 | 38 | 7 | 0 | 53 | *trnT-GGU/psbD (IGS)* |
| 7 | [49410--49438](http://tandem.bu.edu/trf/output/903gUh6q031pg.2.7.7.80.10.50.500.1.txt.html#49410--49438,14,2.1,14,7) | 28 | 14×2 | 44 | 27 | 13 | 13 | *trnl-UAA/trnF-GAA(IGS)* |
| 8 | [52068--52092](http://tandem.bu.edu/trf/output/903gUh6q031pg.2.7.7.80.10.50.500.1.txt.html#52068--52092,11,2.3,11,8) | 22 | 11×2 | 24 | 0 | 0 | 76 | *ndhC/trnV-UAC (IGS)* |
| 9 | [68344--68393](http://tandem.bu.edu/trf/output/903gUh6q031pg.2.7.7.80.10.50.500.1.txt.html#68344--68393,25,2.0,25,9) | 50 | 25×2 | 56 | 8 | 2 | 34 | *trnp-UGG/psaJ (IGS)* |
| 10 | [69493--69525](http://tandem.bu.edu/trf/output/903gUh6q031pg.2.7.7.80.10.50.500.1.txt.html#69493--69525,16,2.0,17,10) | 32 | 16×2 | 42 | 15 | 0 | 42 | *rpl33/rps18* |
| 11 | [69603--69643](http://tandem.bu.edu/trf/output/903gUh6q031pg.2.7.7.80.10.50.500.1.txt.html#69603--69643,21,2.0,21,11) | 42 | 21×2 | 29 | 24 | 9 | 36 | *rps 18 (CDS)* |
| 12 | [83802--83829](http://tandem.bu.edu/trf/output/903gUh6q031pg.2.7.7.80.10.50.500.1.txt.html#83802--83829,14,2.0,14,12) | 28 | 14×2 | 28 | 14 | 0 | 57 | *rpl16 (intron)* |
| 13 | [90523--90612](http://tandem.bu.edu/trf/output/903gUh6q031pg.2.7.7.80.10.50.500.1.txt.html#90523--90612,21,4.1,22,13) | 84 | 21×4 | 12 | 23 | 10 | 54 | *ycf 2 (CDS)* |
| 14 | [92965--93024](http://tandem.bu.edu/trf/output/903gUh6q031pg.2.7.7.80.10.50.500.1.txt.html#92965--93024,18,3.3,18,17) | 54 | 18×3 | 31 | 10 | 25 | 33 | *ycf 2 (CDS)* |
| 15 | [95422--95457](http://tandem.bu.edu/trf/output/903gUh6q031pg.2.7.7.80.10.50.500.1.txt.html#95422--95457,17,2.1,17,18) | 34 | 17×2 | 41 | 11 | 5 | 41 | *trnl-CAA/ndhB (IGS)* |
| 16 | [100391--100452](http://tandem.bu.edu/trf/output/903gUh6q031pg.2.7.7.80.10.50.500.1.txt.html#100391--100452,22,2.7,24,19) | 44 | 22×2 | 35 | 3 | 9 | 51 | *rps12/ycf15 (IGS)* |
| 17 | [108174--108239](http://tandem.bu.edu/trf/output/903gUh6q031pg.2.7.7.80.10.50.500.1.txt.html#108174--108239,32,2.1,32,20) | 64 | 32×2 | 42 | 22 | 9 | 25 | *4.5/5S Rrna (IGS)* |
| 18 | [112480--112518](http://tandem.bu.edu/trf/output/903gUh6q031pg.2.7.7.80.10.50.500.1.txt.html#112480--112518,20,2.0,20,21) | 40 | 20×2 | 56 | 23 | 0 | 20 | *ndhF (CDS)* |
| 19 | [113159--113199](http://tandem.bu.edu/trf/output/903gUh6q031pg.2.7.7.80.10.50.500.1.txt.html#113159--113199,10,4.1,10,22) | 40 | 10×4 | 51 | 12 | 0 | 36 | *­­­­­­­ndhF/rpl32 (IGS)* |
| 20 | [127895--127954](http://tandem.bu.edu/trf/output/903gUh6q031pg.2.7.7.80.10.50.500.1.txt.html#127895--127954,28,2.2,28,24) | 56 | 28×2 | 0 | 23 | 5 | 71 | *ycf1 (CDS)* |
| 21 | [132001--132066](http://tandem.bu.edu/trf/output/903gUh6q031pg.2.7.7.80.10.50.500.1.txt.html#132001--132066,32,2.1,32,28) | 64 | 32×2 | 25 | 9 | 22 | 42 | *rrn 5/rrn 4.5S (IGS)* |
| 22 | [139788--139849](http://tandem.bu.edu/trf/output/903gUh6q031pg.2.7.7.80.10.50.500.1.txt.html#139788--139849,22,2.7,24,29) | 44 | 22×2 | 51 | 9 | 3 | 35 | *ycf15/rps12 (IGS)* |
| 23 | [144783--144818](http://tandem.bu.edu/trf/output/903gUh6q031pg.2.7.7.80.10.50.500.1.txt.html#144783--144818,17,2.1,17,30) | 34 | 17×2 | 41 | 5 | 11 | 41 | *ndhB/ trnL-CAA (IGS)* |
| 24 | [147216--147275](http://tandem.bu.edu/trf/output/903gUh6q031pg.2.7.7.80.10.50.500.1.txt.html#147216--147275,18,3.3,18,32) | 54 | 18×3 | 33 | 25 | 10 | 31 | *ycf2 (CDS)* |
| 25 | [149628--149717](http://tandem.bu.edu/trf/output/903gUh6q031pg.2.7.7.80.10.50.500.1.txt.html#149628--149717,21,4.1,22,38) | 84 | 21×4 | 54 | 10 | 23 | 12 | *ycf2 (CDS)* |

**Table S7c**. Tandem Repeat sequences in the *Withania riebeckii* chloroplast genome.

| Serial no | Indices | Repeat Length | Size of repeat unit × Copy Number | A | C | G | T | Location |
| --- | --- | --- | --- | --- | --- | --- | --- | --- |
| 1 | [155--179](http://tandem.bu.edu/trf/output/89iCr2JUSfTwk.2.7.7.80.10.50.500.1.txt.html#155--179,12,2.1,12,1) | 24 | 12×2 | 8 | 16 | 0 | 76 | *trnH-GUG/ psbA (IGS)* |
| 2 | [5012--5037](http://tandem.bu.edu/trf/output/89iCr2JUSfTwk.2.7.7.80.10.50.500.1.txt.html#5012--5037,13,2.0,13,2) | 26 | 13×2 | 23 | 15 | 0 | 61 | *trnk-UUU/rps16 (IGS)* |
| 3 | [6250--6279](http://tandem.bu.edu/trf/output/89iCr2JUSfTwk.2.7.7.80.10.50.500.1.txt.html#6250--6279,10,3.1,10,3) | 30 | 10×3 | 20 | 20 | 0 | 60 | *rps16/ trnQ-UUG (IGS)* |
| 4 | [16950--16982](http://tandem.bu.edu/trf/output/89iCr2JUSfTwk.2.7.7.80.10.50.500.1.txt.html#16950--16982,17,2.0,16,4) | 34 | 17×2 | 18 | 15 | 0 | 66 | *rps2/rpoc2 (IGS)* |
| 5 | [33310--33335](http://tandem.bu.edu/trf/output/89iCr2JUSfTwk.2.7.7.80.10.50.500.1.txt.html#33310--33335,13,2.0,13,5) | 26 | 13×2 | 38 | 7 | 0 | 53 | *trnT-GGU/psbD (IGS)* |
| 6 | [49383--49411](http://tandem.bu.edu/trf/output/89iCr2JUSfTwk.2.7.7.80.10.50.500.1.txt.html#49383--49411,14,2.1,14,6) | 28 | 14×2 | 44 | 27 | 13 | 13 | *trnl-UAA/trnF-GAA(IGS)* |
| 7 | [52035--52059](http://tandem.bu.edu/trf/output/89iCr2JUSfTwk.2.7.7.80.10.50.500.1.txt.html#52035--52059,11,2.3,11,7) | 22 | 11×2 | 24 | 0 | 0 | 76 | *ndhC/trnV-UAC (IGS)* |
| 8 | [68295--68344](http://tandem.bu.edu/trf/output/89iCr2JUSfTwk.2.7.7.80.10.50.500.1.txt.html#68295--68344,25,2.0,25,8) | 50 | 25×2 | 56 | 8 | 2 | 34 | *trnp-UGG/psaJ (IGS)* |
| 9 | [69541--69581](http://tandem.bu.edu/trf/output/89iCr2JUSfTwk.2.7.7.80.10.50.500.1.txt.html#69541--69581,21,2.0,21,9) | 42 | 21×2 | 29 | 24 | 9 | 36 | *rps 18 (CDS)* |
| 10 | [90443--90532](http://tandem.bu.edu/trf/output/89iCr2JUSfTwk.2.7.7.80.10.50.500.1.txt.html#90443--90532,21,4.1,22,10) | 84 | 21×4 | 12 | 23 | 10 | 54 | *ycf 2 (CDS)* |
| 11 | [92885--92944](http://tandem.bu.edu/trf/output/89iCr2JUSfTwk.2.7.7.80.10.50.500.1.txt.html#92885--92944,18,3.3,18,14) | 54 | 18×3 | 31 | 10 | 25 | 33 | *ycf 2 (CDS)* |
| 12 | [95342--95377](http://tandem.bu.edu/trf/output/89iCr2JUSfTwk.2.7.7.80.10.50.500.1.txt.html#95342--95377,17,2.1,17,15) | 34 | 17×2 | 41 | 11 | 5 | 41 | *trnl-CAA/ndhB (IGS)* |
| 13 | [100311--100372](http://tandem.bu.edu/trf/output/89iCr2JUSfTwk.2.7.7.80.10.50.500.1.txt.html#100311--100372,22,2.7,24,16) | 44 | 22×2 | 35 | 3 | 9 | 51 | *rps12/ycf15 (IGS)* |
| 14 | [108094--108159](http://tandem.bu.edu/trf/output/89iCr2JUSfTwk.2.7.7.80.10.50.500.1.txt.html#108094--108159,32,2.1,32,17) | 64 | 32×2 | 42 | 22 | 9 | 25 | *4.5/5S rRNA (IGS)* |
| 15 | [112310--112348](http://tandem.bu.edu/trf/output/89iCr2JUSfTwk.2.7.7.80.10.50.500.1.txt.html#112310--112348,20,2.0,20,18) | 40 | 20×2 | 56 | 23 | 0 | 20 | *ndhF (CDS)* |
| 16 | [112989--113029](http://tandem.bu.edu/trf/output/89iCr2JUSfTwk.2.7.7.80.10.50.500.1.txt.html#112989--113029,10,4.1,10,19) | 40 | 10×4 | 51 | 12 | 0 | 36 | *­­­­­­­ndhF/rpl32 (IGS)* |
| 17 | [127721--127780](http://tandem.bu.edu/trf/output/89iCr2JUSfTwk.2.7.7.80.10.50.500.1.txt.html#127721--127780,28,2.2,28,21) | 56 | 28×2 | 0 | 23 | 5 | 71 | *ycf1 (CDS)* |
| 18 | [131715--131780](http://tandem.bu.edu/trf/output/89iCr2JUSfTwk.2.7.7.80.10.50.500.1.txt.html#131715--131780,32,2.1,32,25) | 64 | 32×2 | 25 | 9 | 22 | 42 | *rrn 5/rrn 4.5S (IGS)* |
| 19 | [139502--139563](http://tandem.bu.edu/trf/output/89iCr2JUSfTwk.2.7.7.80.10.50.500.1.txt.html#139502--139563,22,2.7,24,26) | 44 | 22×2 | 51 | 9 | 3 | 35 | *ycf15/rps12 (IGS)* |
| 20 | [144497--144532](http://tandem.bu.edu/trf/output/89iCr2JUSfTwk.2.7.7.80.10.50.500.1.txt.html#144497--144532,17,2.1,17,27) | 34 | 17×2 | 41 | 5 | 11 | 41 | *ndhB/ trnL-CAA (IGS)* |
| 21 | [146930--146989](http://tandem.bu.edu/trf/output/89iCr2JUSfTwk.2.7.7.80.10.50.500.1.txt.html#146930--146989,18,3.3,18,29) | 54 | 18×3 | 33 | 25 | 10 | 31 | *ycf2 (CDS)* |
| 22 | [149342--149431](http://tandem.bu.edu/trf/output/89iCr2JUSfTwk.2.7.7.80.10.50.500.1.txt.html#149342--149431,21,4.1,22,35) | 84 | 21×4 | 54 | 10 | 23 | 12 | *ycf2 (CDS)* |
