# Supplementary material for: Comparative Plastomics of Ashwagandha (Withania, Solanaceae) and Identification of Mutational Hotspots for Barcoding Medicinal Plants
Source: Preprints.org preprint supplement (doi:10.20944/preprints202003.0181.v1), 2020-03-11
Supplement: Supplementary file 8 [file Table S7 Reputer.xlsx]

## Sheet: WS
S.No	Type	Location	Region	Repeat Sequence	Size	confirm
1	P	petB-PetD	LSC	TATAAGTGAACTAGATAAAACGGAATCTTGATTCCGTTTTATCTAGTTCACTTATA	56	y
2	P	psbT-psbN	LSC	TTGAAGTACTGAGCCTCCCGATATCGGGAGGCTCAGTACTTCAA	44	y
3	F	psaB/psaA	LSC	TGCAATAGCTAAATGGTGATGGGCAATATCAGTCAGCCA	39	y
4	F	ycf3/ndhA/rps12-ycf15	LSC/SSC	TACAGAACCGTACATGAGATTTTCACCTCATACGGCTCCTC	39	y
5	P	trns-GGA	LSC	ACGGAAAGAGAGGGATTCGAA	30	y
6	F	ycf2	IR	CGATATTGATGATAGTGACGATATTGATGATAGTGAC	37	y
7	F	4.5-5S rRNA	IR	CATTGTTCAAATCTTTGACAACACGAAAAAACCA	34	y
8	P	ycf2-trnL	IR	TTGAGAATGCTCATTGAATGAGCATTCTCAA	31	y
9	F	ycf2-trnL	IR	TTGAGAATGCTCATTGAATGAGCATTCTCAA	31	y
10	F	ndhF-rpl32	SSC	ACTAACTTAAACTAATTTAAACTAATTTAAA	31	Y

## Sheet: WC
S.No	Type	Location	Region	CDS/IGS/Intron/GENE	position 1	size	Postion 2	Size	sequence
1	P	LSC	petD	INTRON	78232	56	78232	56	GTATAAGTGAACTAGATAAAACGGAATCTTGATTCCGTTTTATCTAGTTCACTTAT
2	P	LSC	psbT-psbN	IGS	75808	44	75808	44	CTTGAAGTACTGAGCCTCCCGATATCGGGAGGCTCAGTACTTCA
3	F	LSC	psaB/psaA	CDS	39816	39	42040	39	TTGCAATAGCTAAATGGTGATGGGCAATATCAGTCAGCC
4	F	IR/SSC	rps12-trnV-GAC/ndhA	IGS/INTRON	99440	41	120931	41	TTACAGAACCGTACGTGAGATTTTCACCTCATACGGCTCCT
5	F	LSC/SSC	ycf3-ndhA	INTRON	44855	39	120933	39	ACAGAACCGTACGTGAGATTTTCACCTCATACGGCTCCT
6	F	LSC/IR	ycf3-rps12-trnV-GAC	IGS	44855	39	99442	39	ACAGAACCGTACATGAGATTTTCACCTCATACGGCTCCT
7	P	LSC	psbI-trnS-GCU/trnS-GGA	IGS/GENE	8561	30	46584	30	TTACCGAGGGTTCGAATCCCTCTCTTTCCG
8	P	IR	ycf15	GENE	94914	31	94914	31	CTTGAGAATGCTCATTGAATGAGCATTCTCA
9	F	SSC	ndhf-rpl32	IGS	113069	31	113079	31	GACTAACTTAAACTAATTTAAACTAATTTAA
10	F	IR	rrn4.5-rrn5	IGS	108083	34	108115	34	CCATTGTTCAACTCTTTGACAACATGAAAAAACC
11	F	LSC	ycf3	INTRON	43869	37	44856	35	CAGAACCGTACGTGAGAATTTCACCTCATACGGCT
12	F	IR	ycf2	CDS	92878	37	92896	37	ACGATATTGATGATAGTGACAATCTTGATGCTAGTGA
13	R	LSC	rps16-trnQ-UUG	IGS	6238	33	6249	31	TTTTCTATATCTTCTATATCTTTCTATATCT
14	F	LSC	trnG-GCC/trnG-UCC	GENE	10010	32	37549	30	GAAGATGCGGGTTCGATTCCCGCTATCCGC
15	F	LSC	psbI-trnS-GCU/psbC-trnS-UGA	IGS	8560	31	36601	30	AAAGGAGAGAGAGGGATTCGAACCCTCGAT
16	F	LSC/IR	ycf3/rps12-trnV-GAC	INTRON/IGS	44867	31	99454	30	GTGAGAATTTCACCTCATACGGCTCCTCCCT
17	P	LSC	psbC-trnS-UGA//trnS-GGA	IGS/GENE	36601	30	46584	30	TTACCGAGGGTTCGAATCCCTCTCTTTCCG

## Sheet: WA
S.No	Type	Location	Region	CDS/IGS/Intron/GENE	position 1	size	Postion 2	Size	sequence
1	P	ycf1	IR/SSC	CDS	110775	58	129290	58	CTTACAGAGACAGGCTATAACAATATTAATACTAGTAATAGTCCAATTTATGATTATG
2	P	petD	LSC	INTRON	78307	56	78307	56	GTATAAGTGAACTAGATAAAACGGAATCAAGATTCCGTTTTATCTAGTTCACTTAT
3	P	psbT-psbN	LSC	IGS	75883	44	75883	44	CTTGAAGTACTGAGCCTCCCGATATCGGGAGGCTCAGTACTTCA
4	F	psaB/psaA	LSC	CDS	39854	39	42078	39	ATGCAATAGCTAAATGGTGATGGGCAATATCAGTCAGCC
5	F	rps12-trnV-GAC/ndhA	IR/SSC	IGS/INTRON	99526	41	121021	41	CTACAGAACCGTACATGAGATTTTCACCTCATACGGCTCCT
6	F	YCF3/NDHA	LSC/SSC	INTRON	44891	39	121023	39	CCAGAACCGTACGTGAGAATTTCACCTCATACGGCTCCT
7	P	trnS-GCU/trnS-GGA	LSC	GENE	8585	30	46620	30	AACGGAAAGAGAGGGATTCGAACCCTCGGT
8	P	YCF15/trnL-CAA	IR	IGS	95000	31	95000	31	CTTGAGAATGCTCATTGAATGAGCATTCTCA
9	F	ndhF/rpl32	SSC	IGS	113158	31	113168	31	GACTAACTTAAACTAATTTAAACTAATTTAA
10	F	RRN4.5/RRN5	IR	IGS	108173	34	108205	34	TCATTGTTCAAATCTTTGACAACACGAAAAAACC
11	F	YCF3	LSC	INTRON	43907	37	44892	35	TAGAACCGTACTTGAGAATTTCTTACCTCATACGGCT
12	F	YCF2	IR	CDS	92964	37	92982	37	TCGATATTGATGATAGTGACGATATTGATGATAGTGA
13	P	rps16-trnQ-UUG	LSC	IGS	6420	31	6420	31	TTTATTTATAATTTATATAAATATATAAATA
14	R	rps16-trnQ-UUG	LSC	IGS	6244	33	6255	31	AATCTATAGTATTTTCTATATCTTCTATATCTT
15	F	trnG-GCC/trnG-UCC	LSC	GENE	10036	32	37587	30	TAACGATGCGGGTTCGATTCCCGCTACCCG
16	P	rpl20-rps12/rpl32-trnL-UAG	LSC/SSC	IGS	71175	32	114342	31	GATATGATAGAGTTTTTTTTTTTTTAATTTAA
17	F	ycf2	LSC	CDS	90544	32	90565	32	CTTTTTGTCCAAGTCACTTCTTTTTTTGTCCA
18	F	trnS-GCU/trnS-UGA	LSC	GENE	8584	31	36639	30	CAACGGAAAGAGAGGGATTCGAACCCTCGGT
19	F	YCF3/rps12-trnV-GAC	LSC/IR	GENE/IGS	44903	31	99540	30	GTGAGAATTTCACCTCATACGGCTCCTCCCT
20	P	trnL-UAA-trnF-GAA	LSC	IGS	49512	31	49539	30	TAGATTGGGGTTGGTAGACCAGAGGCTTTGC
21	P	trnS-UGA/trnS-GGA	LSC	GENE	36639	30	46620	30	AAAGGAGAGAGAGGGATTCGAACCCTCGAT

## Sheet: WR
S.No	Type	Location	Region	CDS/IGS/Intron/GENE	position 1	size	Postion 2	Size	sequence
1	P	petD	LSC	GENE	78241	56	78241	56	GTATAAGTGAACTAGATAAAACGGAATCAAGATTCCGTTTTATCTAGTTCACTTAT
2	P	psbT/psbN	LSC	IGS	75817	44	75817	44	CTTGAAGTACTGAGCCTCCCGATATCGGGAGGCTCAGTACTTCA
3	F	psaB/psaA	LSC	IGS	39825	39	42049	39	ATGCAATAGCTAAATGGTGATGGGCAATATCAGTCAGCC
4	F	rps12-trnV-GAC/ndhA	IR	IGS/INTRON	99446	41	120852	41	CTACAGAACCGTACATGAGATTTTCACCTCATACGGCTCCT
5	F	ycf3/ndhA	LSC/SSC	INTRON	44864	39	120854	39	CCAGAACCGTACGTGAGAATTTCACCTCATACGGCTCCT
6	F	ycf3/rps12-trnV-GAC	LSC/IR	INTRON/IGS	44864	39	99448	39	CCAGAACCGTACGTGAGAATTTCACCTCATACGGCTCCT
7	P	trnS-GCU/trnS-GGA	LSC	GENE	8580	30	46594	30	AACGGAAAGAGAGGGATTCGAACCCTCGGT
8	P	ycf15-trnL-CAA	IR	IGS	94920	31	94920	31	CTTGAGAATGCTCATTGAATGAGCATTCTCA
9	F	rrn4.5/rrn5	IR	IGS	108093	34	108125	34	TCATTGTTCAAATCTTTGACAACACGAAAAAACC
10	F	ycf3	LSC	INTRON	43878	37	44865	35	TAGAACCGTACTTGAGAATTTCTTACCTCATACGGCT
11	F	ycf2	IR	CDS	92884	37	92902	37	TCGATATTGATGATAGTGACGATATTGATGATAGTGA
12	P	rps16-trnQ-UUG	LSC	IGS	6412	31	6412	31	TTTATTTATAATTTATATAAATATATAAATA
13	R	rps16-trnQ-UUG	LSC	IGS	6238	33	6249	31	AATCTATAGTATTTTCTATATCTTCTATATCTT
14	F	trnS-GCC/trnG-UCC	LSC	GENE	10030	32	37558	30	TAACGATGCGGGTTCGATTCCCGCTACCCGCT
15	F	ycf2	IR	CDS	90464	32	90485	32	CTTTTTGTCCAAGTCACTTCTTTTTTTGTCCA
16	F	trnS-GCU/trnS-UGA	LSC	GENE	8579	31	36610	30	CAACGGAAAGAGAGGGATTCGAACCCTCGGT
17	F	ycf3/rps12-trnV-GAC	LSC	INTRON/IGS	44876	31	99460	30	GTGAGAATTTCACCTCATACGGCTCCTCCCT
18	P	trnS-UGA/trnS-GGA	LSC	GENE	36610	30	46594	30	AAAGGAGAGAGAGGGATTCGAACCCTCGAT
