# Supplementary material for: Comparative Plastomics of Ashwagandha (Withania, Solanaceae) and Identification of Mutational Hotspots for Barcoding Medicinal Plants
Source: Preprints.org preprint supplement (doi:10.20944/preprints202003.0181.v1), 2020-03-11
Supplement: Supplementary file 9 [file Table S8 PREP.docx]

**Table S8.** Putative RNA editing sites in the *Withania somnifera* chloroplast genome.

| **Genes** | **Nucleotide positions** | **Amino Acid positions** | **Codon and Amino Acid conversion** | **Score** |
| --- | --- | --- | --- | --- |
| ***atpF*** | 92 | 31 | CCA (P) => CTA (L) | 0.86 |
| ***clpP*** | 2129 | 710 | CCG (P) => CTG (L) | 0.86 |
| 2389 | 797 | CAT (H) => TAT (Y) | 1 |
| ***ndhA*** | 341 | 114 | TCA (S) => TTA (L) | 1 |
| 1694 | 565 | ACA (T) => ATA (I) | 1 |
| ***ndhD*** | 2 | 1 | ACG (T) => ATG (M) | 1 |
| 383 | 128 | TCA (S) => TTA (L) | 1 |
| 599 | 200 | TCA (S) => TTA (L) | 1 |
| 674 | 225 | TCG (S) => TTG (L) | 1 |
| 878 | 293 | TCA (S) => TTA (L) | 1 |
| 1298 | 433 | TCA (S) => TTA (L) | 0.8 |
| 1310 | 437 | TCA (S) => TTA (L) | 0.8 |
| ***ndhF*** | 290 | 97 | TCA (S) => TTA (L) | 1 |
| 1273 | 425 | CGG (R) => TGG (W) | 0.8 |
| ***ndhB*** | 149 | 50 | TCA (S) => TTA (L) | 1 |
| 467 | 156 | CCA (P) => CTA (L) | 1 |
| 586 | 196 | CAT (H) => TAT (Y) | 1 |
| 611 | 204 | TCA (S) => TTA (L) | 0.8 |
| 737 | 246 | CCA (P) => CTA (L) | 1 |
| 746 | 249 | TCT (S) => TTT (F) | 1 |
| 830 | 277 | TCA (S) => TTA (L) | 1 |
| 836 | 279 | TCA (S) => TTA (L) | 1 |
| 1481 | 494 | CCA (P) => CTA (L) | 1 |
| ***petB*** | 1358 | 453 | CCA (P) => CTA (L) | 1 |
| ***psbL*** | 374 | 125 | ACG (T) => ATG (M) | 1 |
| ***rpl20*** | 338 | 113 | TCA (S) => TTA (L) | 0.86 |
| ***rpoA*** | 1112 | 371 | TCA (S) => TTA (L) | 1 |
| ***rpoB*** | 338 | 113 | TCT (S) => TTT (F) | 1 |
| 473 | 158 | TCA (S) => TTA (L) | 0.86 |
| 551 | 184 | TCA (S) => TTA (L) | 1 |
| 2000 | 667 | TCT (S) => TTT (F) | 1 |
| 2426 | 809 | TCA (S) => TTA (L) | 0.86 |
| ***rpoC2*** | 2299 | 767 | CGG (R) => TGG (W) | 1 |
| 3743 | 1248 | TCA (S) => TTA (L) | 0.86 |
| ***rpoC1*** | 62 | 21 | TCA (S) => TTA (L) | 1.00 |
| ***rps2*** | 248 | 83 | TCA (S) => TTA (L) | 1 |
| ***rps14*** | 485 | 162 | TCA (S) => TTA (L) | 1 |

**Table S8a.** Putative RNA editing sites in the *Withania coagulans* chloroplast genome.

| **Genes** | **Nucleotide positions** | **Amino Acid positions** | **Codon and Amino Acid conversion** | **Score** |
| --- | --- | --- | --- | --- |
| ***atpF*** | 92 | 31 | CCA (P) => CTA (L) | 0.86 |
| ***ndhA*** | 341 | 114 | TCA (S) => TTA (L) | 1 |
| 566 | 189 | TCA (S) => TTA (L) | 1 |
| 1073 | 358 | TCC (S) => TTC (F) | 1 |
| ***ndhB*** | 149 | 50 | TCA (S) => TTA (L) | 1 |
| 467 | 156 | CCA (P) => CTA (L) | 1 |
| 586 | 196 | CAT (H) => TAT (Y) | 1 |
| 611 | 204 | TCA (S) => TTA (L) | 0.8 |
| 737 | 246 | CCA (P) => CTA (L) | 1 |
| 746 | 249 | TCT (S) => TTT (F) | 1 |
| 830 | 277 | TCA (S) => TTA (L) | 1 |
| 836 | 279 | TCA (S) => TTA (L) | 1 |
| 1481 | 494 | CCA (P) => CTA (L) | 1 |
| ***ndhD*** | 29 | 10 | ACG (T) => ATG (M) | 1 |
| 410 | 137 | TCA (S) => TTA (L) | 1 |
| 626 | 209 | TCA (S) => TTA (L) | 1 |
| 701 | 234 | TCG (S) => TTG (L) | 1 |
| 905 | 302 | TCA (S) => TTA (L) | 1 |
| 1325 | 442 | TCA (S) => TTA (L) | 0.8 |
| 1337 | 446 | TCA (S) => TTA (L) | 0.8 |
| ***petB*** | 611 | 204 | CCA (P) => CTA (L) | 1 |
| ***psbL*** | 2 | 1 | ACG (T) => ATG (M) | 1 |
| ***rpl20*** | 338 | 113 | TCA (S) => TTA (L) | 0.86 |
| ***rpoA*** | 830 | 277 | TCA (S) => TTA (L) | 1 |
| ***rpoB*** | 338 | 113 | TCT (S) => TTT (F) | 1 |
| 473 | 158 | TCA (S) => TTA (L) | 0.86 |
| 551 | 184 | TCA (S) => TTA (L) | 1 |
| 2000 | 667 | TCT (S) => TTT (F) | 1 |
| 2426 | 809 | TCA (S) => TTA (L) | 0.86 |
| ***rpoc1*** | 41 | 14 | TCA (S) => TTA (L) | 1 |
| ***rpoc2*** | 2287 | 763 | CGG (R) => TGG (W) | 1 |
| 3731 | 1244 | TCA (S) => TTA (L) | 0.86 |
| ***rps2*** | 248 | 83 | TCA (S) => TTA (L) | 1 |
| ***rps14*** | 80 | 27 | TCA (S) => TTA (L) | 1 |

**Table S8b.** Putative RNA editing sites in the *Withania adpressa* chloroplast genome.

| **Genes** | **Nucleotide positions** | **Amino Acid positions** | **Codon and Amino Acid conversion** | **Score** |
| --- | --- | --- | --- | --- |
| ***atpF*** | 92 | 31 | CCA (P) => CTA (L) | 0.86 |
| ***ccsA*** | 656 | 219 | ACT (T) => ATT (I) | 0.86 |
| 853 | 285 | CCG (P) => TCG (S) | 1 |
| 926 | 309 | CCT (P) => CTT (L) | 0.86 |
| 1489 | 497 | CAC (H) => TAC (Y) | 1 |
| ***ndhA*** | 341 | 114 | TCA (S) => TTA (L) | 1 |
| 566 | 189 | TCA (S) => TTA (L) | 1 |
| 1073 | 358 | TCC (S) => TTC (F) | 1 |
| ***ndhB*** | 149 | 50 | TCA (S) => TTA (L) | 1 |
| 467 | 156 | CCA (P) => CTA (L) | 1 |
| 586 | 196 | CAT (H) => TAT (Y) | 1 |
| 611 | 204 | TCA (S) => TTA (L) | 0.8 |
| 737 | 246 | CCA (P) => CTA (L) | 1 |
| 746 | 249 | TCT (S) => TTT (F) | 1 |
| 830 | 277 | TCA (S) => TTA (L) | 1 |
| 836 | 279 | TCA (S) => TTA (L) | 1 |
| 1481 | 494 | CCA (P) => CTA (L) | 1 |
| ***ndhD*** | 29 | 10 | ACG (T) => ATG (M) | 1 |
| 410 | 137 | TCA (S) => TTA (L) | 1 |
| 626 | 209 | TCA (S) => TTA (L) | 1 |
| 701 | 234 | TCG (S) => TTG (L) | 1 |
| 905 | 302 | TCA (S) => TTA (L) | 1 |
| 1325 | 442 | TCA (S) => TTA (L) | 0.8 |
| 1337 | 446 | TCA (S) => TTA (L) | 0.8 |
| ***petB*** | 611 | 204 | CCA (P) => CTA (L) | 1 |
| ***psbL*** | 52 | 18 | CAC (H) => TAC (Y) | 1 |
| 68 | 23 | CCT (P) => CTT (L) | 1 |
| ***rpl20*** | 338 | 113 | TCA (S) => TTA (L) | 0.86 |
| ***rpoA*** | 830 | 277 | TCA (S) => TTA (L) | 1 |
| ***rpoB*** | 338 | 113 | TCT (S) => TTT (F) | 1 |
| 473 | 158 | TCA (S) => TTA (L) | 0.86 |
| 551 | 184 | TCA (S) => TTA (L) | 1 |
| 2000 | 667 | TCT (S) => TTT (F) | 1 |
| 2426 | 809 | TCA (S) => TTA (L) | 0.86 |
| ***rpoc1*** | 41 | 14 | TCA (S) => TTA (L) | 1 |
| ***rpoc2*** | 2287 | 763 | CGG (R) => TGG (W) | 1 |
| 3731 | 1244 | TCA (S) => TTA (L) | 0.86 |
| ***rps2*** | 248 | 83 | TCA (S) => TTA (L) | 1 |
| ***rps14*** | 80 | 27 | TCA (S) => TTA (L) | 1 |

**Table S8c.** Putative RNA editing sites in the *Withania riebeckii* chloroplast genome.

| **Genes** | **Nucleotide positions** | **Amino Acid positions** | **Codon and Amino Acid conversion** | **Score** |
| --- | --- | --- | --- | --- |
| ***atpF*** | 92 | 31 | CCA (P) => CTA (L) | 0.86 |
| ***ndhA*** | 341 | 114 | TCA (S) => TTA (L) | 1 |
|  | 566 | 189 | TCA (S) => TTA (L) | 1 |
|  | 1073 | 358 | TCC (S) => TTC (F) | 1 |
| ***ndhB*** | 149 | 50 | TCA (S) => TTA (L) | 1 |
|  | 467 | 156 | CCA (P) => CTA (L) | 1 |
|  | 586 | 196 | CAT (H) => TAT (Y) | 1 |
|  | 611 | 204 | TCA (S) => TTA (L) | 0.8 |
|  | 737 | 246 | CCA (P) => CTA (L) | 1 |
|  | 746 | 249 | TCT (S) => TTT (F) | 1 |
|  | 830 | 277 | TCA (S) => TTA (L) | 1 |
|  | 836 | 279 | TCA (S) => TTA (L) | 1 |
|  | 1481 | 494 | CCA (P) => CTA (L) | 1 |
| ***ndhD*** | 29 | 10 | ACG (T) => ATG (M) | 1 |
|  | 410 | 137 | TCA (S) => TTA (L) | 1 |
|  | 626 | 209 | TCA (S) => TTA (L) | 1 |
|  | 701 | 234 | TCG (S) => TTG (L) | 1 |
|  | 905 | 302 | TCA (S) => TTA (L) | 1 |
|  | 1325 | 442 | TCA (S) => TTA (L) | 0.8 |
|  | 1337 | 446 | TCA (S) => TTA (L) | 0.8 |
| ***ndhF*** | 290 | 97 | TCA (S) => TTA (L) | 1 |
|  | 1273 | 425 | CGG (R) => TGG (W) | 0.8 |
| ***petB*** | 611 | 204 | CCA (P) => CTA (L) | 1 |
| ***psbL*** | 52 | 18 | CAC (H) => TAC (Y) | 1 |
|  | 68 | 23 | CCT (P) => CTT (L) | 1 |
| ***rpl20*** | 338 | 113 | TCA (S) => TTA (L) | 0.86 |
| ***rpoA*** | 830 | 277 | TCA (S) => TTA (L) | 1 |
| ***rpoB*** | 338 | 113 | TCT (S) => TTT (F) | 1 |
|  | 473 | 158 | TCA (S) => TTA (L) | 0.86 |
|  | 551 | 184 | TCA (S) => TTA (L) | 1 |
|  | 2000 | 667 | TCT (S) => TTT (F) | 1 |
|  | 2426 | 809 | TCA (S) => TTA (L) | 0.86 |
| ***rpoC1*** | 41 | 14 | TCA (S) => TTA (L) | 1 |
| ***rpoC2*** | 2287 | 763 | CGG (R) => TGG (W) | 1 |
|  | 3731 | 1244 | TCA (S) => TTA (L) | 0.86 |
| ***rps2*** | 248 | 83 | TCA (S) => TTA (L) | 1 |
| ***rps14*** | 80 | 27 | TCA (S) => TTA (L) | 1 |
